# Supplementary material for: Dapagliflozin protects neural and vascular dysfunction of the retina in diabetes
Source: HighWire-hosted journal article supplement (doi:10.1136/bmjdrc-2022-002801), 2022-05-01
Supplement: bmjdrc-2022-002801supp004_data_supplement.xlsx [file bmjdrc-2022-002801supp004_data_supplement.xlsx]

## Sheet: Sheet1
Supplemental Table S1: Complete Blood Count (CBC) analysis of blood treated with dapagliflozin (n=9, db/m; n=4, db/db and n=7, db/db+dapagliflozin). The data were analyzed using a one-way ANOVA followed by Fisher’s LSD test.
	db/m	db/db Untreated	p-value (db/m vs db/db untreated)	db/db + Dapagliflozin	p-value (db/db untreated vs. db/db + dapagliflozin)
Leukocytes	3.992	6.34	0.178	5.404	0.3931
Neutrophils	1.056	2.175	0.0805	1.61	0.3788
Lymphocytes	2.688	3.808	0.428	3.39	0.6153
Monocytes	0.1278	0.1875	0.8248	0.2257	0.4903
Eosinophils	0.09556	0.145	0.5342	0.1529	0.3142
Basophils	0.02556	0.025	0.9997	0.02571	0.9999
% Neutrophils	24.44	36.4	0.0815	29.11	0.5412
% Lymphocytes	68.22	57.85	0.1977	63.61	0.6133
% Monocytes	3.6	2.7	0.7686	3.786	0.9839
% Eosinophils	3.133	2.625	0.9029	2.871	0.962
% Basophils	0.6	0.425	0.87	0.6143	0.9987
RBC	6.143	6.065	0.9981	8.529	0.1152
Hgb	9.733	10.38	0.9546	14.1	0.0742
Hct	28.66	31.33	0.9122	42.86	0.047
MCV	46.42	51.53	0.0157	50.3	0.0287
MCH	15.76	16.9	0.0834	16.56	0.1637
MCHC	34.02	32.8	0.0955	32.94	0.0767
% RDW	15.1	13.65	0.382	14	0.4512
PLT	268.4	757	0.3762	454	0.8102
MPV	6.167	6.025	0.9599	6.329	0.927
